# Supplementary material
Source: PubMed Central journal article supplement (PMC4788304)
Supplement: neuj877100.ww1_default.pdf [file neuj877100.ww1_default.pdf]

## Appendix: Citations for Guidelines (chronological order)

- 1) Jellinger PS, Dickey RA, Ganda OP, Mehta AE, Nguyen TT, Rodbard HW, et al. AACE Medical Guidelines for Clinical Practice for the Diagnosis and Treatment of Dyslipidemia and Prevention of Atherogenesis: 2002 Amended Version: Jacksonville, FL. <https://www.aace.com/publications/guidelines>. Association of Clinical Endocrinologists, 2002
- 2) Veterans Administration/Department of Defense . Clinical Practice Guideline for the Management of Diabetes Mellitus. Washington (DC): Department of Veterans Affairs, Department of Defense; 2003.
- 3) Grundy SM, Cleeman JI, Merz CN, Brewer HB, Jr., Clark LT, Hunninghake DB, et al. Implications of Recent Clinical Trials for the National Cholesterol Education Program Adult Treatment Panel III guidelines. *Circulation* 2004;110(2):227-39.
- 4) Fletcher B, Berra K, Ades P, Braun LT, Burke LE, Durstine JL, et al. Managing abnormal blood lipids: a collaborative approach. *Circulation* 2005;112(20):3184-209.
- 5) Feig DS, Palda VA, Lipscombe L. Screening for type 2 Diabetes Mellitus to Prevent Vascular Complications: Updated Recommendations from the Canadian Task Force on Preventive Health Care. *CMAJ* 2005;172(2):177-80.
- 6) Veterans Administration/Department of Defense. Management of Dyslipidemia Working Group. VA/DoD Clinical Practice Guideline for the Management of Dyslipidemia. Washington (DC): Department of Veterans Affairs, Department of Defense; 2006.
- 7) Rodbard HW, Blonde L, Braithwaite SS, Brett EM, Cobin RH, Handelsman Y, et al. American Association of Clinical Endocrinologists Medical Guidelines for Clinical Practice for the Management of Diabetes Mellitus. *Endocr Pract* 2007;13 Suppl 1:1-68.
- 8) Canadian Diabetes Association Clinical Practice Guidelines Expert Committee. Canadian Diabetes Association 2008 Clinical Practice Guidelines for the Prevention and Management of Diabetes in Canada. *Can J Diabetes*. 2008;32(suppl 1):S1-S201.
- 9) Screening for Type 2 Diabetes Mellitus in Adults: U.S. Preventive Services Task Force Recommendation Statement. *Ann Intern Med* 2008;148(11):846-54.
- 10) USPSTF. Screening for Lipid Disorders in Adults. Rockville, MD: <http://www.uspreventiveservicestaskforce.org/uspstf08/lipid/lipidrs.htm#rationale> Agency for Healthcare Research and Quality, 2008.
- 11) Woolley T, et al. Health Care Guideline: Lipid Management in Adults: Institute for Clinical Systems Improvement, 2009:72.

12) Genest J, McPherson R, Frohlich J, Anderson T, Campbell N, Carpentier A, et al. 2009 Canadian Cardiovascular Society/Canadian guidelines for the diagnosis and treatment of dyslipidemia and prevention of cardiovascular disease in the adult - 2009 recommendations. *Can J Cardiol* 2009;25(10):567-79.

13) Standards of medical care in diabetes--2010. *Diabetes Care* 2010;33 Suppl 1:S11-61.

14) Redmon B, et al. Diagnosis and Management of Type 2 Diabetes Mellitus in Adults: Institute for Clinical Systems Improvement, 2010.
